# Supplementary material
Source: MDPI journal article supplement (https://www.mdpi.com/2073-4344/13/2/426)
Supplement: s1 [file s1]

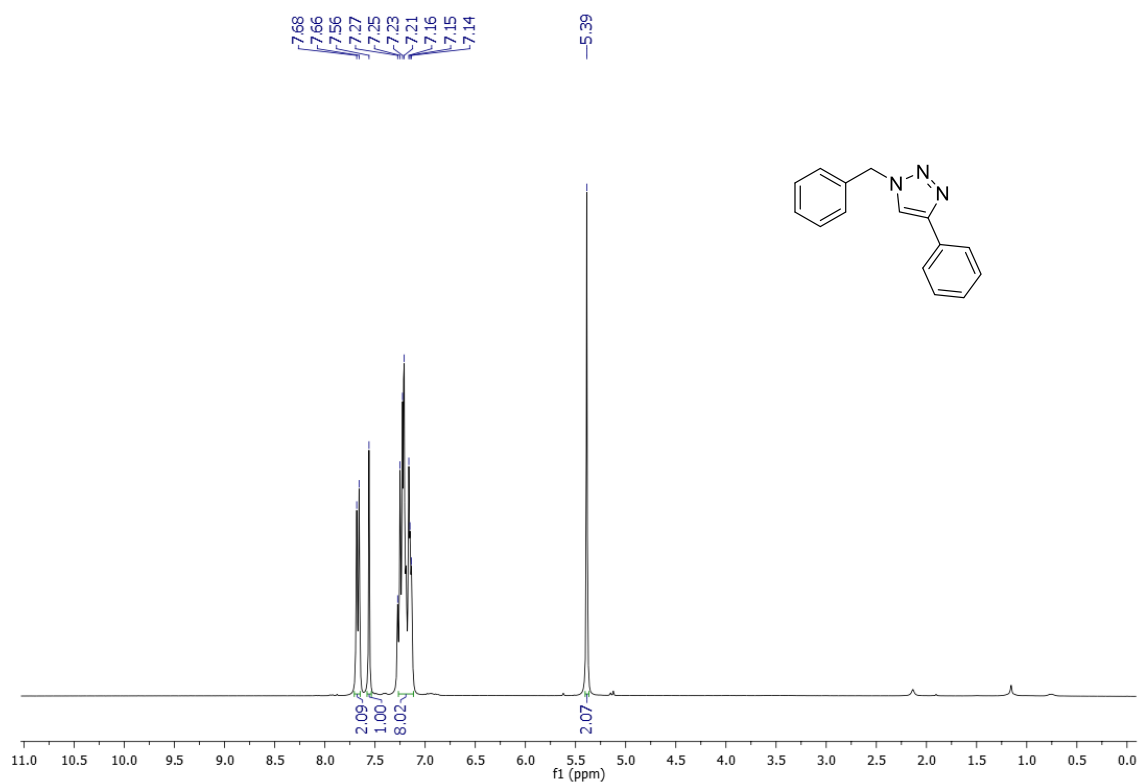

**Figure S1:** <sup>1</sup>H NMR spectrum (300 MHz, CDCl<sub>3</sub>) of 1,2,3-triazole **3a**.

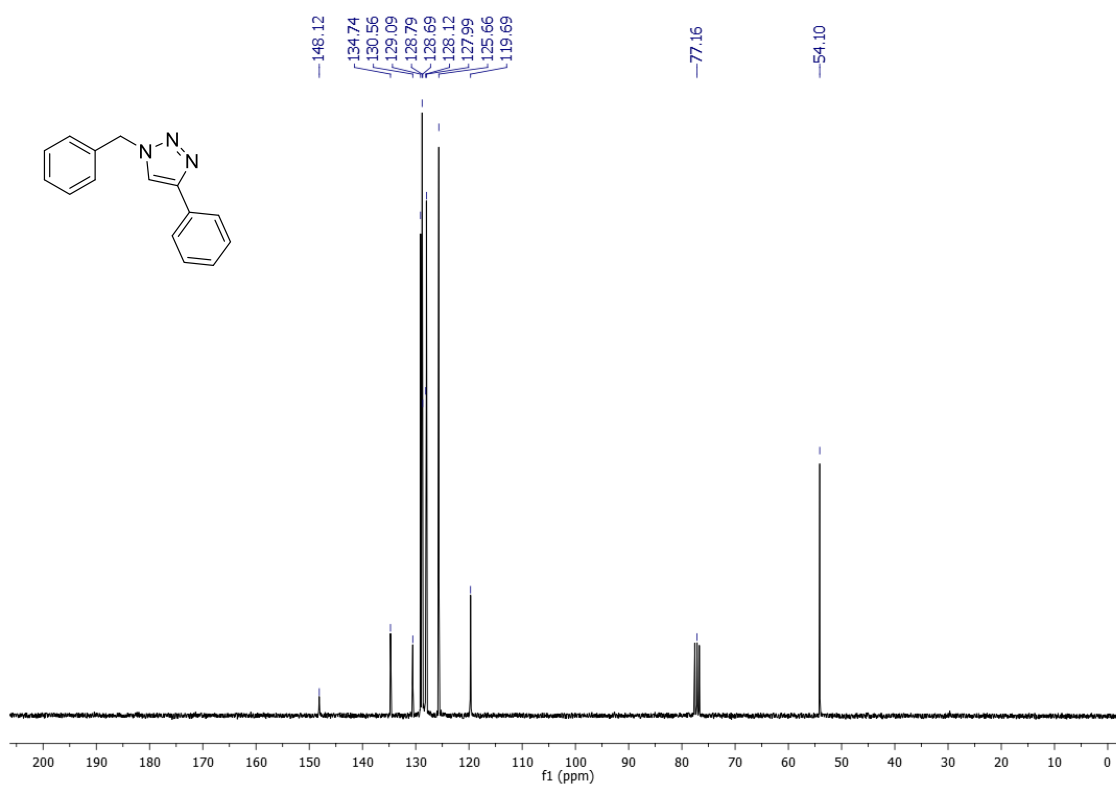

**Figure S2:** <sup>13</sup>C NMR spectrum (75 MHz, CDCl<sub>3</sub>) of 1,2,3-triazole **3a**.

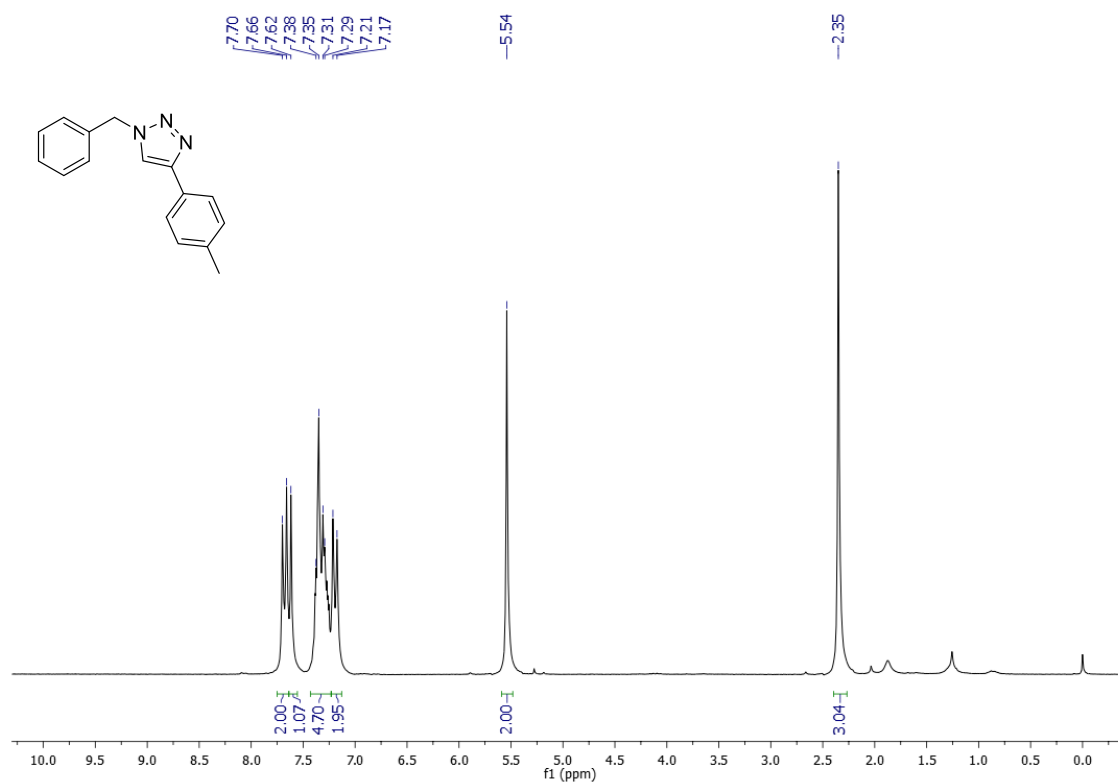

**Figure S3:** <sup>1</sup>H NMR spectrum (300 MHz, CDCl<sub>3</sub>) of 1,2,3-triazole **3b**.

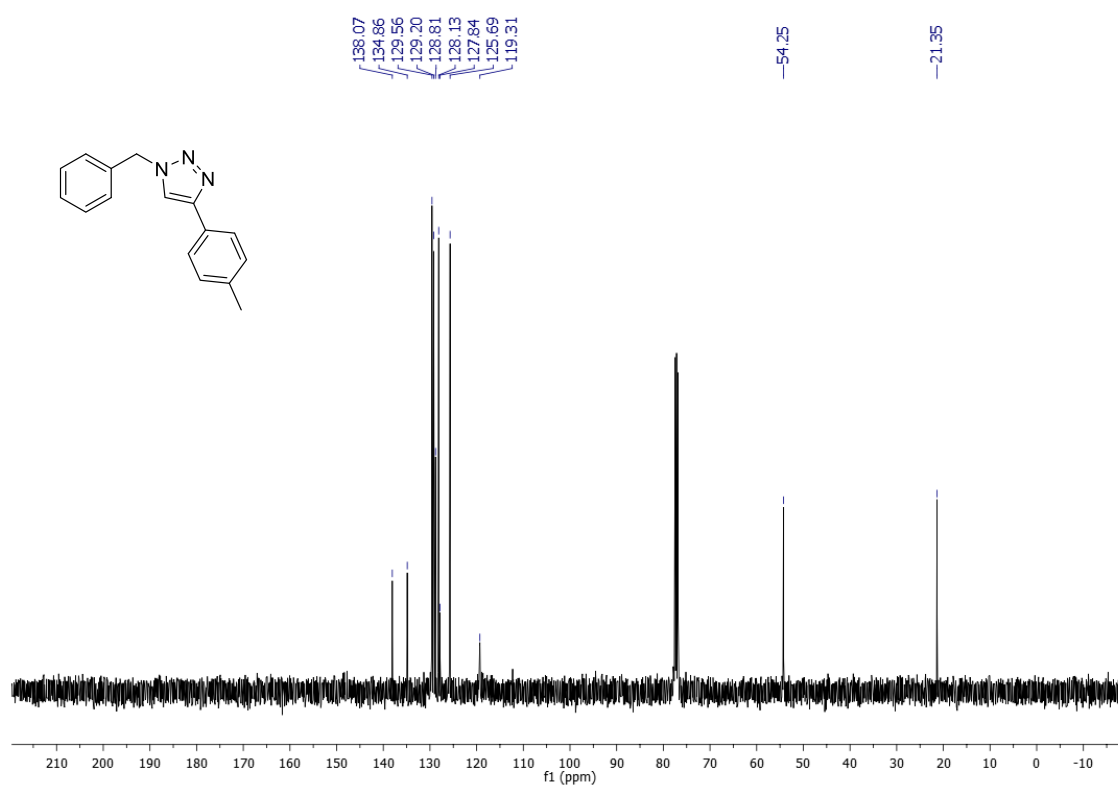

**Figure S4.** <sup>13</sup>C NMR spectrum (75 MHz, CDCl<sub>3</sub>) of 1,2,3-triazole **3b**.

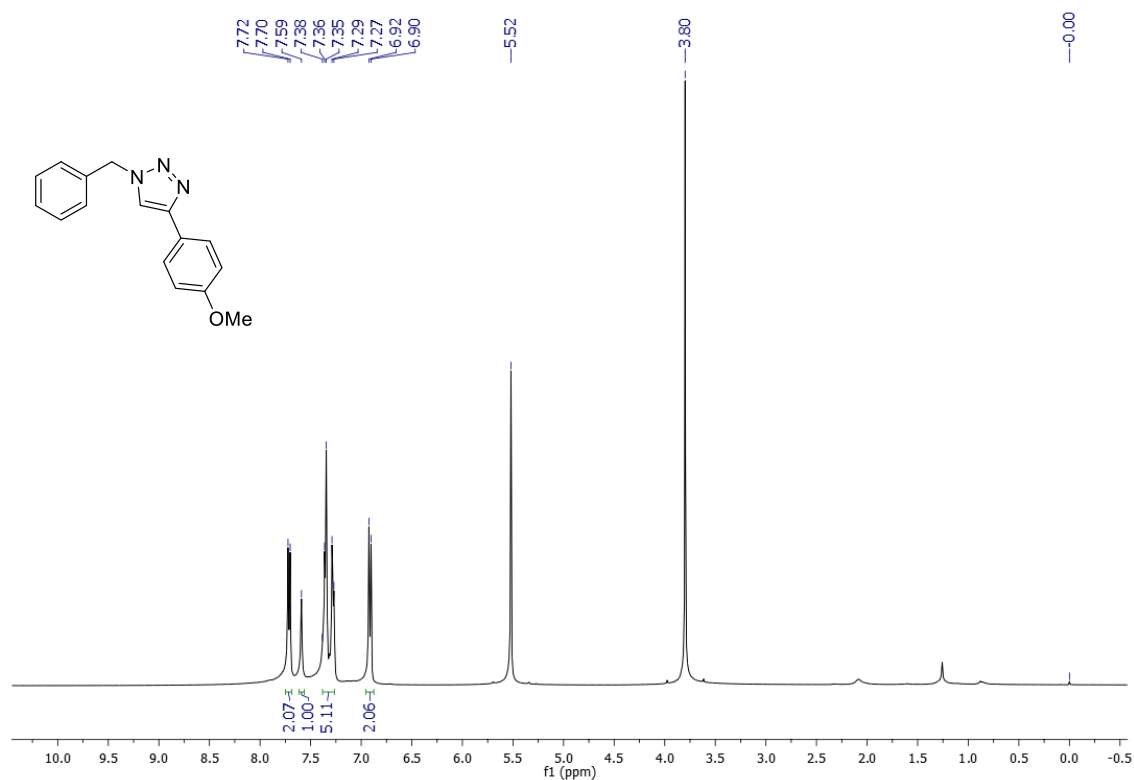

**Figure S5:** <sup>1</sup>H NMR spectrum (300 MHz, CDCl<sub>3</sub>) of 1,2,3-triazole **3c**.

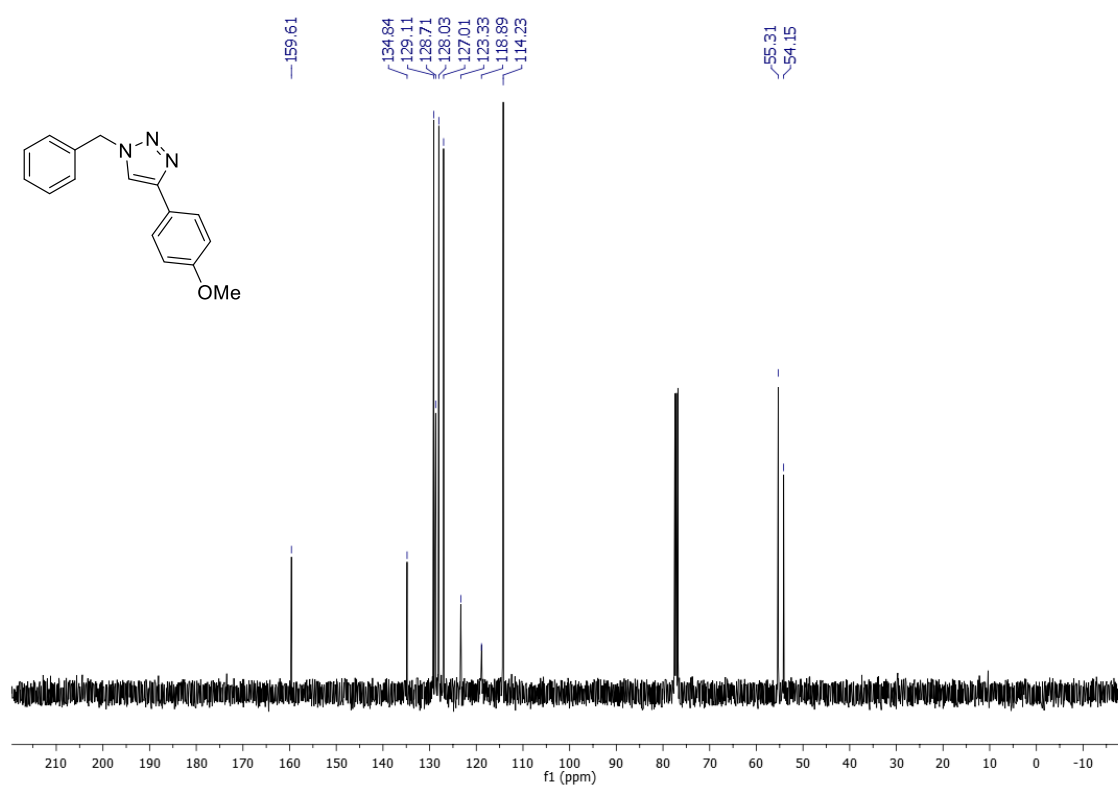

**Figure S6.** <sup>13</sup>C NMR spectrum (75 MHz, CDCl<sub>3</sub>) of 1,2,3-triazole **3c**.

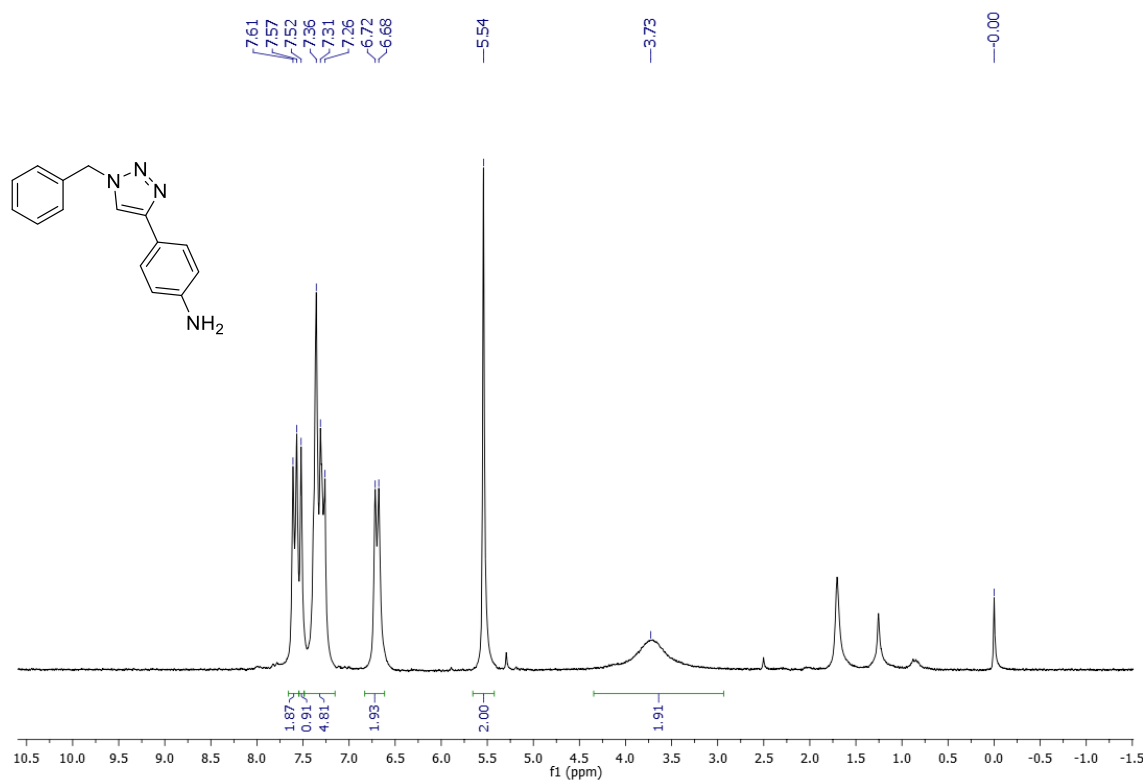

**Figure S7:** <sup>1</sup>H NMR spectrum (300 MHz, CDCl<sub>3</sub>) of 1,2,3-triazole **3d**.

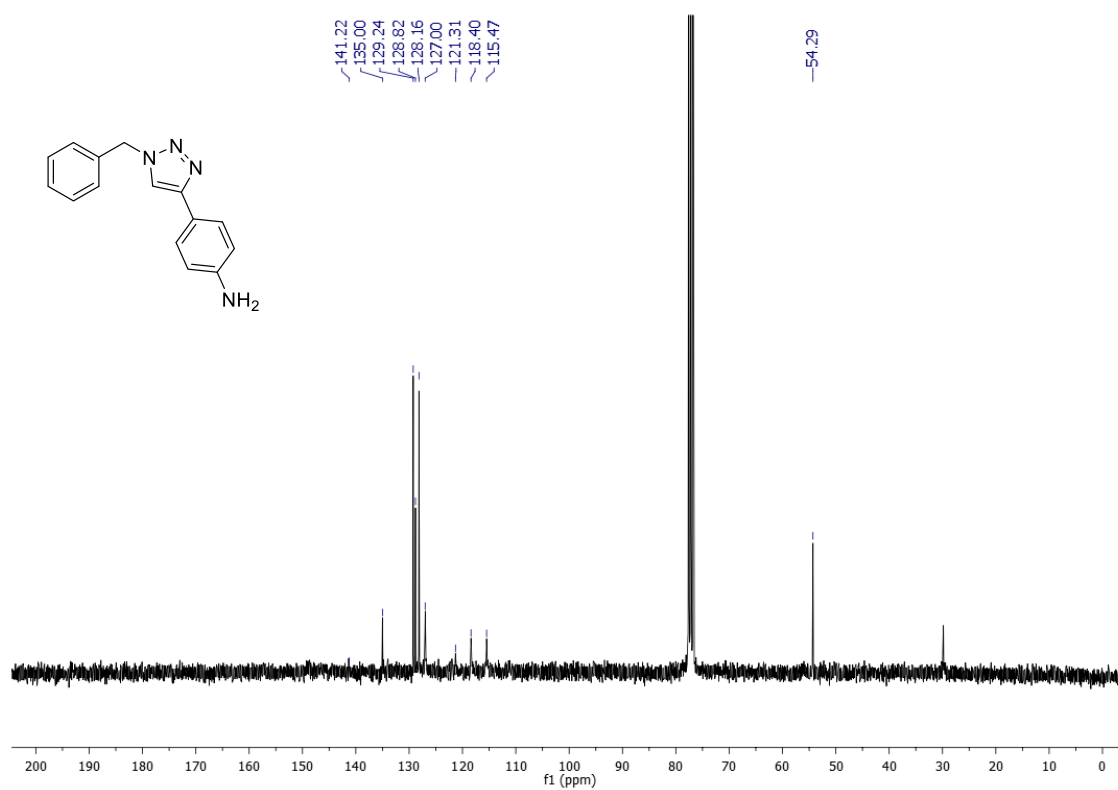

**Figure S8.** <sup>13</sup>C NMR spectrum (75 MHz, CDCl<sub>3</sub>) of 1,2,3-triazole **3d**.

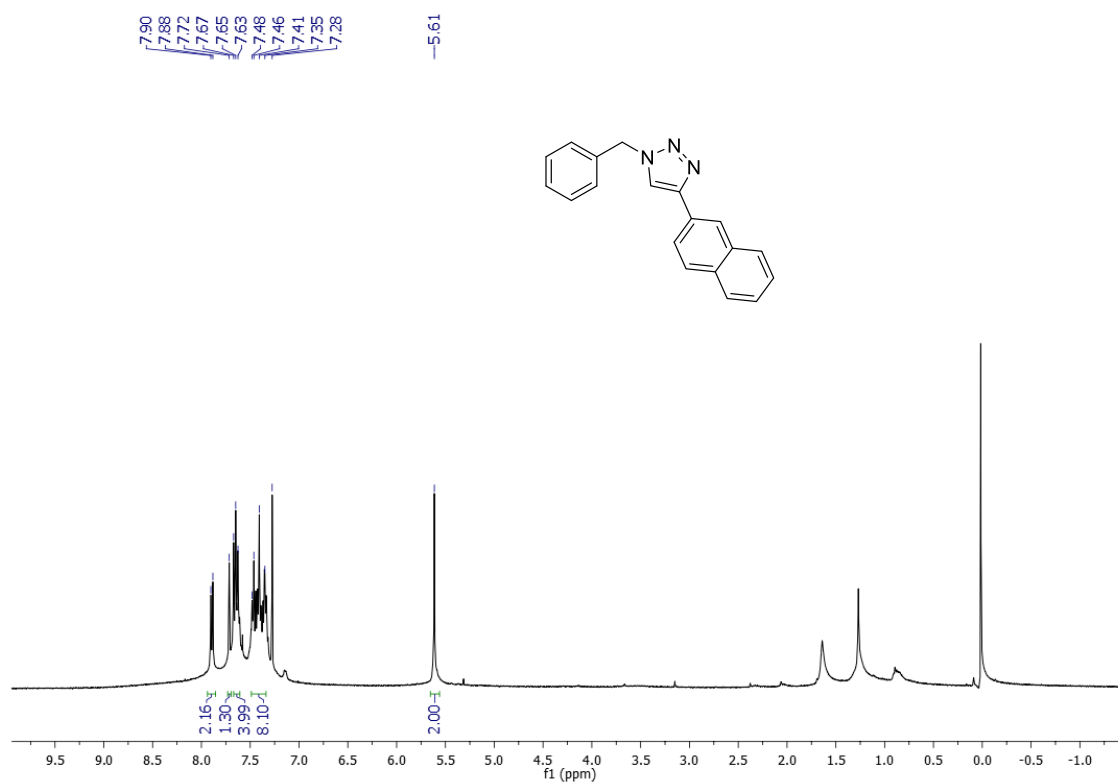

**Figure S9:** <sup>1</sup>H NMR spectrum (300 MHz, CDCl<sub>3</sub>) of 1,2,3-triazole **3e**.

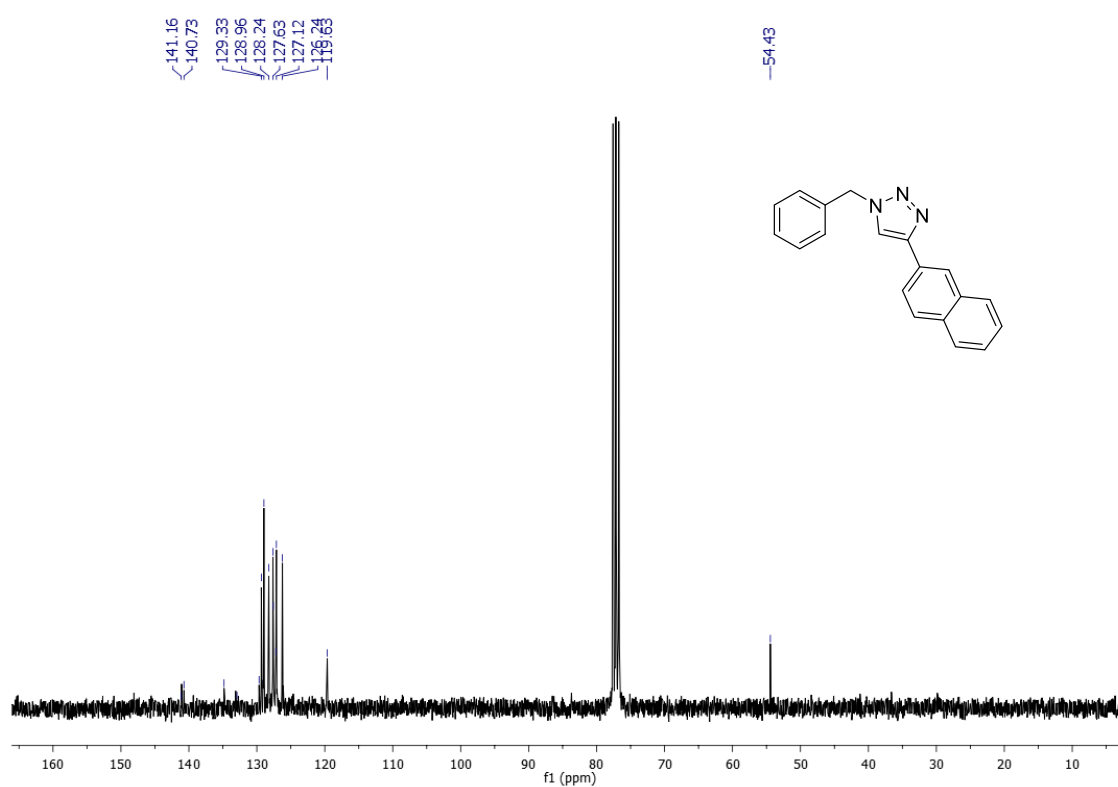

**Figure S10.** <sup>13</sup>C NMR spectrum (75 MHz, CDCl<sub>3</sub>) of 1,2,3-triazole **3e**.
